# Supplementary material for: Chirality induction on non-chiral dye-linked polysilsesquioxane in nanohelical structures
Source: Royal Society of Chemistry journal article supplement (doi:10.1039/d0cc02224a), 2020-01-01
Supplement: d0cc02224a1.pdf [file d0cc02224a1.pdf]

Supplementary Information

## **Chirality induction on non-chiral dye-linked polysilsesquioxane in nanohelical structures**

Naoya Ryu,<sup>a</sup> Tsutomu Kawaguchi,<sup>a</sup> Hiroshi Yanagita,<sup>b</sup> Yutaka Okazaki,<sup>c</sup> Thierry Buffeteau,<sup>d</sup>  
Kyohei Yoshida,<sup>e</sup> Tomohiro Shirosaki,<sup>a</sup> Shoji Nagaoka,<sup>\*ab</sup> Makoto Takafuji,<sup>b</sup> Hirotaka Ihara<sup>\*b</sup>  
and Reiko Oda<sup>\*c</sup>

<sup>a</sup> *Materials Development Department, Kumamoto Industrial Research Institute  
3-11-38 Higashimachi, Higashi-ku Kumamoto 862-0901 (Japan)  
E-mail: nagaoka@kmt-iri.go.jp*

<sup>b</sup> *Department of Applied Chemistry and Biochemistry, Kumamoto University  
2-39-1 Kurokami, Chuo-ku Kumamoto 860-8555 (Japan)  
E-mail: ihara@kumamoto-u.ac.jp*

<sup>c</sup> *International Research and Education Centre of Advanced Energy Science,  
Graduate School of Energy Science, Kyoto University  
Yoshida-Honmachi, Sakyo-ku Kyoto 606-8501 (Japan)*

<sup>d</sup> *Institut des Sciences Moléculaires (UMR5255 ISM), CNRS, Université de Bordeaux  
351 Cours de la Libération, 33405 Talence (France)*

<sup>e</sup> *Institut de Chimie & Biologie des Membranes & des Nano-objets (UMR5248 CBMN), CNRS,  
Université de Bordeaux, Institut Polytechnique Bordeaux  
2 rue Robert Escarpit, 33607 Pessac (France)  
E-mail: r.oda@iecb.u-bordeaux.fr*

## Experimental

### Materials

4,4'-Bis(triethoxysilyl)-1,1'-biphenyl (BS-BP) was purchased from Sigma–Aldrich Co. (St. Louis, MO, USA) and used as received. The cationic gemini surfactant with enantiomeric tartrate counterion (16-2-16 tartrate) was previously synthesized<sup>1a</sup> and used without further purification. Other chemicals were also used without further purification.

### Structure confirmation

The chemical structures of the gemini surfactants were confirmed by Fourier transform infrared spectroscopy (FTIR) measurements with a JASCO FT/IR-6300 FTIR spectrometer equipped with a JASCO ATR Pro450-S, proton nuclear magnetic resonance spectroscopy (<sup>1</sup>H NMR) measurements with a Varian Unity/INOVA 400-MHz Fourier transform NMR spectrometer and elemental analysis (EA) with an Elementar vario MICRO cube elemental analyser.

*N,N'*-Dihexadecyl-*N,N,N',N'*-tetramethylethylene diammonium L-tartrate (16-2-16 L-tartrate): White solid; FTIR (ATR): 3380, 2952, 2917, 2850, 1605, 1469, 1348 and 718 cm<sup>-1</sup>; <sup>1</sup>H NMR (400 MHz, CD<sub>3</sub>OD):  $\delta$  0.89 (6 H, t,  $J = 6.9$  Hz, CH<sub>3</sub>CH<sub>2</sub> × 2), 1.28 (48 H, s, CH<sub>3</sub>(CH<sub>2</sub>)<sub>12</sub> × 2), 1.40–1.41 (4 H, m, CH<sub>3</sub>(CH<sub>2</sub>)<sub>12</sub>CH<sub>2</sub> × 2), 1.81–1.85 (4 H, m, CH<sub>3</sub>(CH<sub>2</sub>)<sub>13</sub>CH<sub>2</sub> × 2), 3.20 (12 H, s, N<sup>+</sup>(CH<sub>3</sub>)<sub>2</sub> × 2), 3.41 (4 H, m, CH<sub>3</sub>(CH<sub>2</sub>)<sub>14</sub>CH<sub>2</sub> × 2), 3.92 (4 H, s, N<sup>+</sup>(CH<sub>2</sub>)<sub>2</sub>N<sup>+</sup>), 4.28 (2 H, s, (CH)<sub>2</sub>) ppm; EA: (Found: C, 67.96; H, 11.89; N, 3.64%. Calculated for C<sub>42</sub>H<sub>86</sub>N<sub>2</sub>O<sub>2</sub>·1.5H<sub>2</sub>O: C, 67.97; H, 12.09; N, 3.78%).

*N,N'*-Dihexadecyl-*N,N,N',N'*-tetramethylethylene diammonium D-tartrate (16-2-16 D-tartrate): White solid; FTIR (ATR): 3386, 2955, 2917, 2850, 1604, 1469, 1348 and 718 cm<sup>-1</sup>; <sup>1</sup>H NMR (400 MHz, CD<sub>3</sub>OD):  $\delta$  0.89 (6 H, t,  $J = 6.8$  Hz, CH<sub>3</sub>CH<sub>2</sub> × 2), 1.28 (48 H, s, CH<sub>3</sub>(CH<sub>2</sub>)<sub>12</sub> × 2), 1.40–1.41 (4 H, m, CH<sub>3</sub>(CH<sub>2</sub>)<sub>12</sub>CH<sub>2</sub> × 2), 1.79–1.85 (4 H, m, CH<sub>3</sub>(CH<sub>2</sub>)<sub>13</sub>CH<sub>2</sub> × 2), 3.20 (12 H, s, N<sup>+</sup>(CH<sub>3</sub>)<sub>2</sub> × 2), 3.41 (4 H, m, CH<sub>3</sub>(CH<sub>2</sub>)<sub>14</sub>CH<sub>2</sub> × 2), 3.92 (4 H, s, N<sup>+</sup>(CH<sub>2</sub>)<sub>2</sub>N<sup>+</sup>), 4.28 (2 H, s, (CH)<sub>2</sub>) ppm; EA: (Found: C, 68.42; H, 11.94; N, 3.67%. Calculated for C<sub>42</sub>H<sub>86</sub>N<sub>2</sub>O<sub>2</sub>·1.2H<sub>2</sub>O: C, 68.47; H, 12.09; N, 3.80%).

### Differential scanning calorimetry measurements

The gel–sol transition temperature ( $T_{\text{gel}}$ ) and transition enthalpy ( $\Delta H$ ) of 16-2-16 L-tartrate in a pyridine-water mixture (19:1 v/v) were measured using differential scanning calorimetry (DSC) measurement with a Seiko Sii Exstar DSC7020 calorimeter. Encapsulated in a silver capsule, 15  $\mu$ L of the dispersion of 16-2-16 L-tartrate (20 mM) was scanned at a heating rate of 2.0 °C min<sup>-1</sup> from 20 °C to 80 °C.

### **Low-voltage scanning transmission electron microscopy and scanning electron microscopy**

Low-voltage scanning transmission electron microscopy (LV-STEM) and scanning transmission electron microscopy (SEM) observations were made with a HITACHI SU8000 scanning electron microscope. 16-2-16 tartrate (5.0 mM) in a pyridine-water mixture (19:1 v/v) aged for 24 h at 20 °C, biphenyl-linked polysilsesquioxane (BP-PSQ) containing 16-2-16 tartrate in the pyridine-water mixture, and washed and sonicated BP-PSQ in ethanol were spotted onto carbon-coated copper grids. The samples were air-dried at ambient temperature (25 °C) by blotting excess solution using filter paper. The sample of 16-2-16 tartrate for LV-STEM observation was post-stained and the sample of BP-PSQ containing 16-2-16 tartrate for SEM observation was coated with osmium tetroxide using a Filgen osmium plasma coater OPC60A.

### **Sonication**

An ultrasonic homogenizer (Branson Sonifier II model 250, Danbury, CT, USA) equipped with a 3.2 mm microtip was used for BP-PSQ dispersed in ethanol (maximum power 50 W, frequency 20 kHz). The samples (2 mL) were sonicated for 3 min (20% amplitude, 0.5 s pulse, 0.5 s pause).

### **Powder X-ray diffraction analysis**

X-ray diffraction (XRD) pattern of BP-PSQ were recorded on an X-ray diffractometer (SmartLab 9kW, Rigaku Corp.) using Cu K $\alpha$  radiation with  $\lambda = 0.15418$  nm operating at 45 kV and 200 mA. Freeze-dried BP-PSQ was mounted on a glass plate and scanned from 2 to 160°  $2\theta$  at a rate of 4° min<sup>-1</sup>.

### **Simulation of molecular structure**

Simulation of molecular structure of BP-PSQ was performed using a molecular modeling system (HyperChem, Hypercube Inc.). The molecular structure was optimized by the MM+ force field.

### **Ultraviolet-visible absorption and electronic circular dichroism spectral measurements**

Ultraviolet-visible (UV-vis) absorption and electronic circular dichroism (ECD) spectral measurements of BP-PSQ (0.05 mM as biphenyl-bis(silsesquioxane) unit) and BS-BP (0.05 mM) in ethanol were performed using a JASCO J-820 spectropolarimeter equipped with a JASCO PTC-423L temperature controller. The samples in a 1.0 cm path length quartz cell were incubated in a sample holder for 5 min at a given temperature, and UV-vis absorption and ECD spectra were measured.

### **Fluorescence spectral measurement**

Fluorescence spectral measurement of BP–PSQ (0.05 mM as biphenyl-bis(silsesquioxane) unit) and BS-BP (0.05 mM) in ethanol was performed using a JASCO FP-6600 spectrofluorometer equipped with a JASCO EHC-573T temperature controller. The samples in a triangular quartz cell (1 × 1 cm) were incubated in a sample holder for 5 min at 20 °C, and fluorescence spectra were measured by the front-face method.

### **Circularly polarized luminescence spectral measurement**

Circularly polarized luminescence (CPL) spectral measurement of BP–PSQ (0.05 mM as biphenyl-bis(silsesquioxane) unit) dispersed in ethanol was performed using a JASCO CPL-200 spectrofluoropolarimeter equipped with a JASCO PTC-423L temperature controller. The samples in a 1.0 cm path length quartz cell were incubated in a sample holder for 5 min at 20 °C, and CPL spectra were measured. Curve fitting of the obtained spectra was carried out using Voigt functions.

### **Fluorescence lifetime measurement**

Time-resolved fluorescence lifetimes ( $\tau$ ) of BP–PSQ (0.05 mM as biphenyl-bis(silsesquioxane) unit) and BS-BP (0.05 mM) in ethanol were measured using a fluorescence lifetime measurement system (QuantaTaurus-Tau C11367-01, Hamamatsu Photonics K.K.) at ambient temperature (25 °C). The detector was set to each emission maximum wavelength. The both samples were excited at 320 nm.

### **Fluorescence quantum yield measurement**

BP–PSQ and BS-BP in ethanol were diluted to absorbance about 0.1 at each absorption maximum wavelength, and subjected to fluorescence quantum yield ( $\phi$ ) measurement using an absolute photoluminescence quantum yield measurement system (C9920-02, Hamamatsu Photonics K.K.) with a solution measurement jig (A10104-01, Hamamatsu Photonics K.K.) at ambient temperature (25 °C).

### **Infrared and vibrational circular dichroism spectral measurements**

Infrared (IR) and vibrational circular dichroism (VCD) spectral measurements of freeze-dried BP–PSQ was performed using a ThermoNicolet Nexus 670 FTIR spectrometer equipped with a VCD optical bench. In this optical bench, the light beam was focused on the sample by a BaF<sub>2</sub> lens (191 mm focal length), passing an optical filter, a BaF<sub>2</sub> wire grid polarizer (Specac), and a ZnSe photoelastic modulator (Hinds Instruments, Type II/ZS50). The light was then focused by a ZnSe lens (38.1 mm focal length) onto a 1 × 1 mm<sup>2</sup> HgCdTe (ThermoNicolet, MCTA\*

E6032) detector. The sample disks were prepared by mixing freeze-dried BP-PSQ with KBr powder and pressing at a pressure of 10 ton/cm<sup>2</sup> in vacuo. IR absorption and VCD spectra were recorded at a resolution of 4 cm<sup>-1</sup>, by coadding 50 scans and 24000 scans (8h acquisition time), respectively. Since the sample preparation may induce molecular orientation, the KBr disks of powdered materials were placed on a rotating sample holder and the VCD spectra were obtained with the KBr disks rotated at four angles around the light beam axis (0°, 45°, 90° and 135°). The VCD spectra of the two enantiomers of freeze-dried BP-PSQ were obtained by averaging the four spectra. Baseline corrections of the VCD spectra were performed by subtracting the raw VCD spectra of a KBr disk without BP-PSQ powders. The photoelastic modulator was adjusted for a maximum efficiency in the mid-IR region at 1400 cm<sup>-1</sup>. Calculations were performed via the standard ThermoNicolet software, using Happ and Genzel apodization, de-Haseth phase-correction and a zero-filling factor of one.

## Supplementary figures

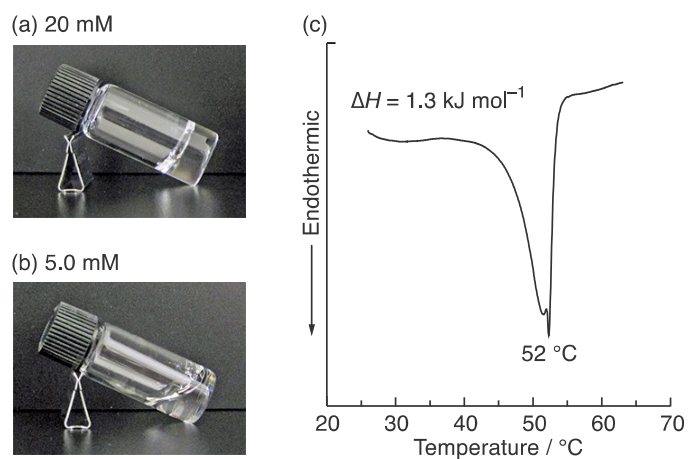

**Fig. S1** Photographs of 16-2-16 L-tartrate in a pyridine–water mixture (19:1 v/v) at ambient temperature (25 °C); [16-2-16 L-tartrate] = (a) 20 and (b) 5.0 mM. (c) DSC thermogram of the heating process of 16-2-16 L-tartrate (20 mM) in a pyridine–water mixture (19:1 v/v); heating rate = 2 °C min<sup>-1</sup>.

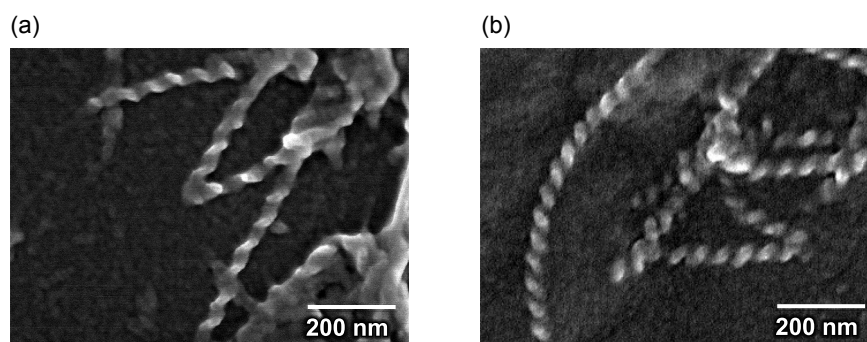

**Fig. S2** SEM images of BP–PSQ containing 16-2-16 (a) L- and (b) D-tartrate before washing and sonication.

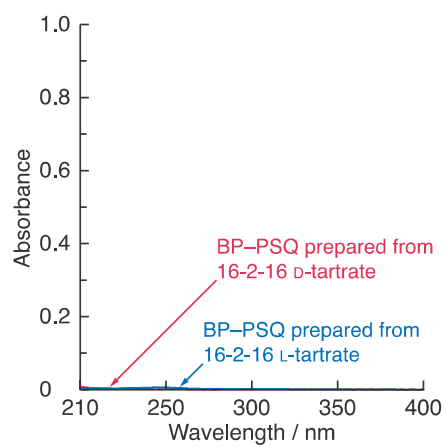

**Fig. S3** UV-vis absorption spectra of last washing solution (methanol) for BP-PSQ prepared from 16-2-16 L- and D-tartrate at 20 °C; path length = 1.0 cm.

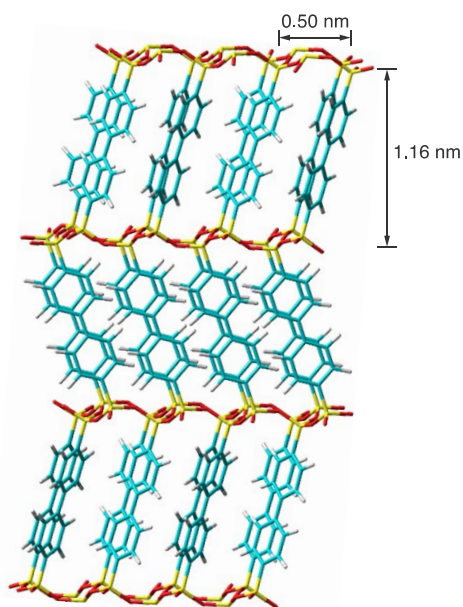

**Fig. S4** Simulated model of the molecular structure of BP-PSQ.

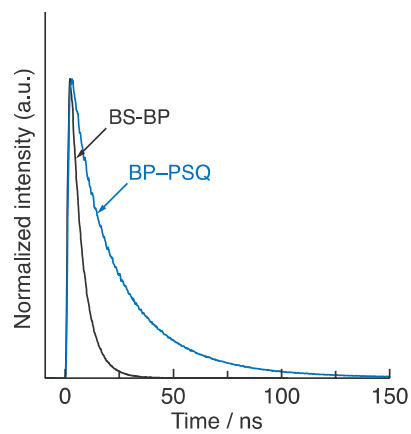

**Fig. S5** Fluorescence decay profiles of BP-PSQ prepared from 16-2-16 L-tartrate and BS-BP in ethanol monitored at 384 and 312 nm, respectively; ambient temperature (25 °C), excitation wavelength = 320 nm.



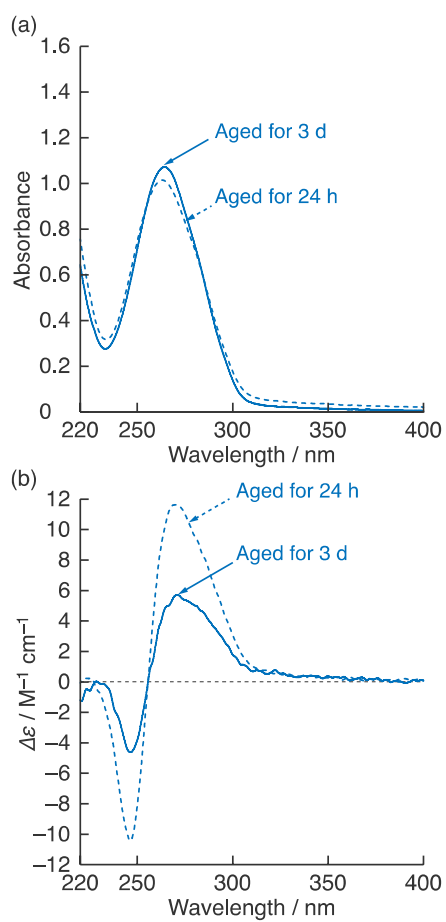

**Fig. S6** (a) UV-vis absorption and (b) ECD spectra of BP-PSQ (0.05 mM as biphenyl-bis(silsesquioxane) unit) prepared from 16-2-16 L-tartrate with different aging time of 24 h and 3 d during the sol-gel process in ethanol at 20 °C; path length = 1.0 cm.

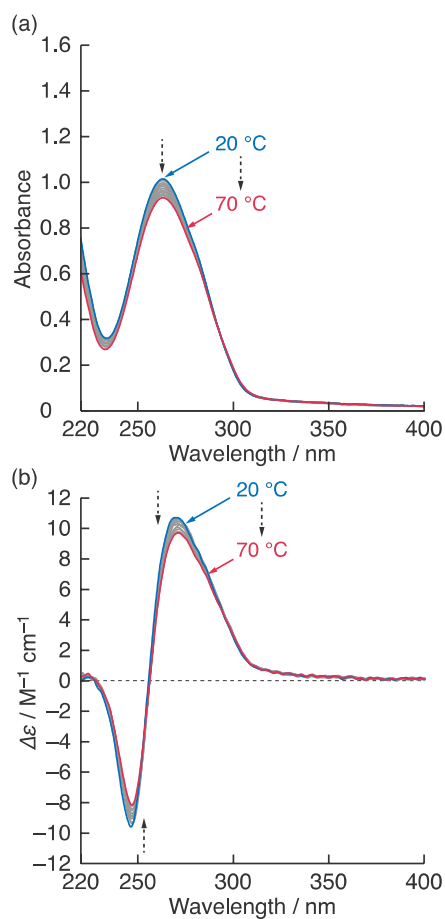

**Fig. S7** (a) UV-vis absorption and (b) ECD spectra of BP-PSQ (0.05 mM as biphenyl-bis(silsesquioxane) unit) prepared from 16-2-16 L-tartrate in ethanol at different temperature (20–70 °C); path length = 1.0 cm.

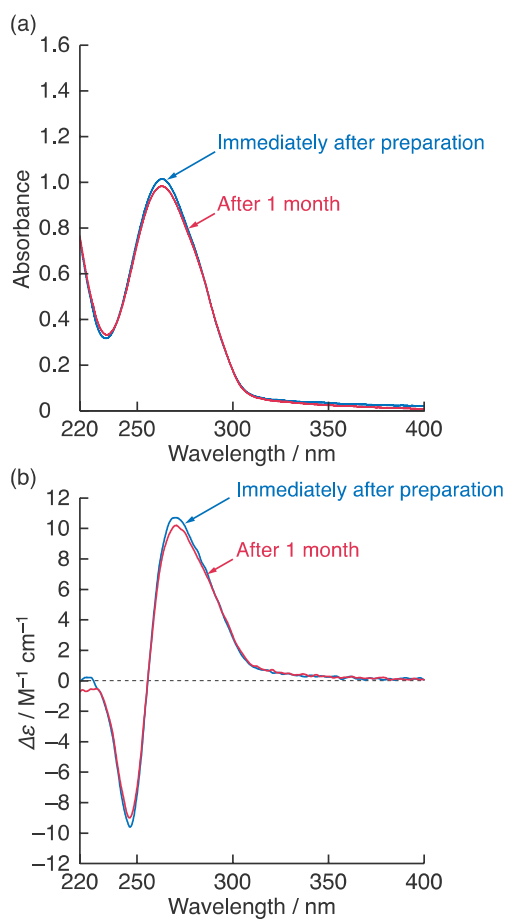

**Fig. S8** (a) UV-vis absorption and (b) ECD spectra of BP-PSQ (0.05 mM as biphenyl-bis(silsesquioxane) unit) prepared from 16-2-16 L-tartrate in ethanol at 20 °C immediately after the sample preparation and after standing at 20 °C in the dark for 1 month from the preparation; path length = 1.0 cm.
